# Supplementary material for: Modulation of Antigen Display on PapMV Nanoparticles Influences Its Immunogenicity
Source: PubMed Central journal article supplement (PMC7829862; doi:10.3390/vaccines9010033), 2021-01-08
Supplement: vaccines-09-00033-s001.pdf [file vaccines-09-00033-s001.pdf]

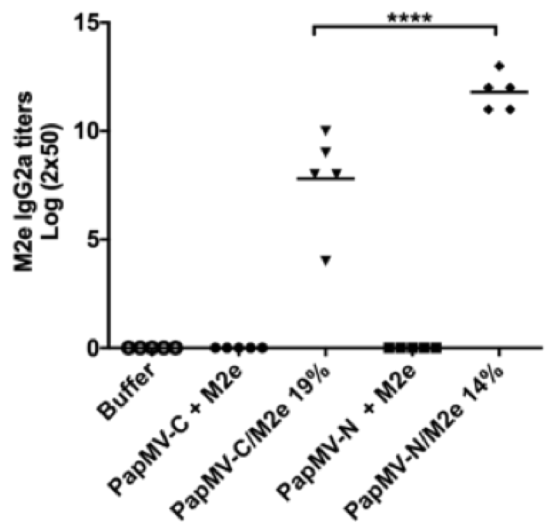

Figure S1

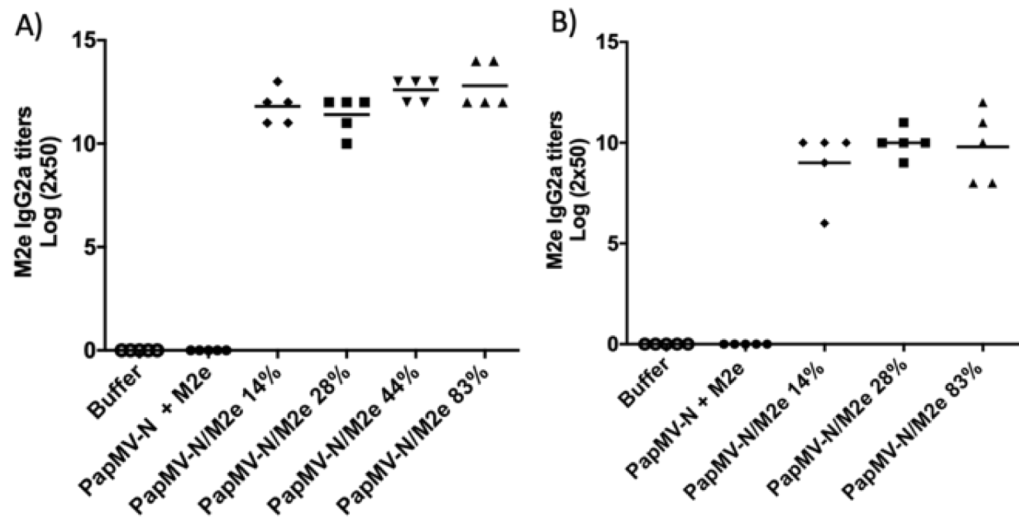

Figure S2

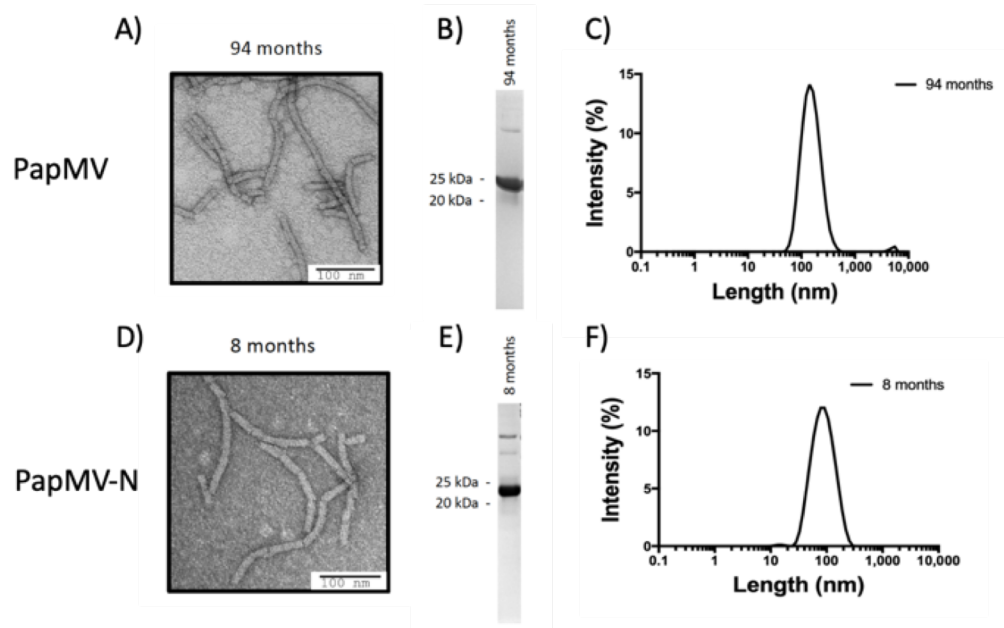

Figure S3
